# Supplementary material
Source: PubMed Central journal article supplement (PMC1994907)
Supplement: NIHMS11722-supplement.pdf [file NIHMS11722-supplement.pdf]

## Supporting Information

### **6-*N,N*-Dimethylamino-2,3-Naphthalimide a New Environment-Sensitive Fluorescent Probe in $\delta$ -Selective and $\mu$ -Selective Opioid Peptides**

M. Eugenio Vázquez<sup>‡</sup>, Juan B. Blanco<sup>‡</sup>, Severo Salvadori<sup>†</sup>, Claudio Trapella<sup>†</sup> Roberto Argazzi<sup>#</sup>, Sharon D. Bryant<sup>§</sup>, Yunden Jinsmaa<sup>§</sup>, Lawrence H. Lazarus<sup>§</sup>, Lucia Negri<sup>∞</sup>, Elisa Giannini<sup>∞</sup>, Roberta Lattanzi<sup>∞</sup>, Mariantonella Colucci<sup>∞</sup>, Gianfranco Balboni\*<sup>†</sup>¶

<sup>‡</sup>*Departamento de Química Orgánica y Unidad Asociada al CSIC, Universidad de Santiago de Compostela 15782 Santiago de Compostela, Spain.* <sup>†</sup>*Department of Pharmaceutical Sciences and Biotechnology Center, University of Ferrara, I-44100 Ferrara, Italy.*

<sup>#</sup>*Department of Chemistry, University of Ferrara, I-44100 Ferrara, Italy.* <sup>§</sup>*Medicinal Chemistry Group, Laboratory of Pharmacology and Chemistry, National Institute of Environmental Health Sciences, Research Triangle Park, NC 27709, USA.* <sup>∞</sup>*Department of Human Physiology and Pharmacology “Vittorio Ersamer,” University La Sapienza, I-00185 Rome, Italy.* \**Department of Toxicology, University of Cagliari, I-09124, Cagliari, Italy*

### In Solution Peptide Synthesis of Compound 3

**Boc-Tyr-Pro-Phe-Phe-OBzl.** To a solution of Boc-Tyr-Pro-OH<sup>27</sup> (0.37 g, 0.97 mmol) and TFA·H-Phe-Phe-OBzl<sup>28</sup> (0.5 g, 0.97 mmol) in DMF (10 mL) at 0 °C, NMM (0.11 mL, 0.97 mmol), HOBt (0.16 g, 1.07 mmol), and WSC (0.2 g, 1.07 mmol) were added. The reaction mixture was stirred for 3 h at 0 °C and 24 h at room temperature. After DMF was evaporated, the residue was dissolved in EtOAc and washed with citric acid (10% in H<sub>2</sub>O), NaHCO<sub>3</sub> (5% in H<sub>2</sub>O), and brine. The organic phase was dried (Na<sub>2</sub>SO<sub>4</sub>) and evaporated to dryness. The residue was precipitated from Et<sub>2</sub>O/Pe (1:9, v/v): yield 0.66 g (89%); *R<sub>f</sub>*(B) 0.91; HPLC *K'* 9.14; mp 133-135 °C;  $[\alpha]_D^{20}$  -22.6; MH<sup>+</sup> 764; <sup>1</sup>H-NMR (DMSO-*d*<sub>6</sub>) δ 1.40 (s, 9H), 1.92-2.34 (m, 4H), 2.92-3.29 (m, 6H), 3.41-3.51 (m, 2H), 4.40-4.92 (m, 4H), 5.34 (s, 2H), 6.68-7.21 (m, 19H).

**Boc-Tyr-Pro-Phe-Phe-OH.** To a solution of Boc-Tyr-Pro-Phe-Phe-OBzl (0.66 g, 0.86 mmol) in methanol (30 mL) was added C/Pd (10%, 0.1 g), and H<sub>2</sub> was bubbled for 1 h at room temperature. After filtration, the solution was evaporated to dryness. The residue was crystallized from Et<sub>2</sub>O/Pe (1:9, v/v): yield 0.56 g (96%); *R<sub>f</sub>*(B) 0.82; HPLC *K'* 7.39; mp 142-144 °C;  $[\alpha]_D^{20}$  -25.1; MH<sup>+</sup> 674.

**Boc-Tyr-Pro-Phe-Phe-NH-(CH<sub>2</sub>)<sub>5</sub>-NH-Z.** To a solution of Boc-Tyr-Pro-Phe-Phe-OH (0.64 g, 0.95 mmol) and TFA·H<sub>2</sub>N-(CH<sub>2</sub>)<sub>5</sub>-NH-Z (0.26 g, 0.95 mmol) in DMF (10 mL) at 0 °C, NMM (0.10 mL, 0.95 mmol), HOBt (0.16 g, 1.05 mmol), and WSC (0.2 g, 1.05 mmol) were added. The reaction mixture was stirred for 3

h at 0 °C and 24 h at room temperature. After DMF was evaporated, the residue was dissolved in EtOAc and washed with citric acid (10% in H<sub>2</sub>O), NaHCO<sub>3</sub> (5% in H<sub>2</sub>O), and brine. The organic phase was dried (Na<sub>2</sub>SO<sub>4</sub>) and evaporated to dryness. The residue was precipitated from Et<sub>2</sub>O/Pe (1:9, v/v): yield 0.70 g (83%); *Rf*(B) 0.95; HPLC *K'* 9.81; mp 125-127 °C;  $[\alpha]_D^{20}$  -18.4; MH<sup>+</sup> 892; <sup>1</sup>H-NMR (DMSO-*d*<sub>6</sub>) δ 1.29-1.55 (m, 15H), 1.92-2.34 (m, 4H), 2.92-3.29 (m, 10H), 3.41-3.51 (m, 2H), 4.40-4.92 (m, 4H), 5.34 (s, 2H), 6.68-7.21 (m, 19H).

**Boc-Tyr-Pro-Phe-Phe-NH-(CH<sub>2</sub>)<sub>5</sub>-NH<sub>2</sub>.** To a solution of Boc-Tyr-Pro-Phe-Phe-NH-(CH<sub>2</sub>)<sub>5</sub>-NH-Z (0.70 g, 0.79 mmol) in methanol (30 mL) was added C/Pd (10%, 0.1 g), and H<sub>2</sub> was bubbled for 1 h at room temperature. After filtration, the solution was evaporated to dryness. The residue was crystallized from Et<sub>2</sub>O/Pe (1:9, v/v): yield 0.50 g (83%); *Rf*(B) 0.76; HPLC *K'* 7.30; mp 138-140 °C;  $[\alpha]_D^{20}$  -20.1; MH<sup>+</sup> 758.

**Boc-Tyr-Pro-Phe-Phe-NH-(CH<sub>2</sub>)<sub>5</sub>-NH-(C=S)-NH-fluorescein.** With stirring at 25 °C under argon, fluorescein isothiocyanate isomer I (0.06 g, 0.15 mmol) was added to a mixture of Boc-Tyr-Pro-Phe-Phe-NH-(CH<sub>2</sub>)<sub>5</sub>-NH<sub>2</sub> (0.11 g, 0.15 mmol) and triethylamine (2.5 mL) in freshly distilled THF (10 mL) and absolute ethanol (15 mL). The mixture was stirred in the dark, at room temperature for 24 h. After solvent evaporation, the residue was purified by preparative HPLC: yield 0.09 g (50%); *Rf*(B) 0.92; HPLC *K'* 9.12; mp 149-151 °C;  $[\alpha]_D^{20}$  -13.4; MH<sup>+</sup> 1147; <sup>1</sup>H-NMR (DMSO-*d*<sub>6</sub>) δ 1.29-1.55 (m, 15H), 1.92-2.34 (m, 4H),

2.92-3.29 (m, 8H), 3.41-3.51 (m, 4H), 4.40-4.92 (m, 4H), 6.11-7.28 (m, 23H).

**TFA·H-Tyr-Pro-Phe-Phe-NH-(CH<sub>2</sub>)<sub>5</sub>-NH-(C=S)-NH-fluorescein (3).** Boc-Tyr-Pro-Phe-Phe-NH-(CH<sub>2</sub>)<sub>5</sub>-NH-(C=S)-NH-fluorescein (0.09 g, 0.08 mmol) was treated with 66% TFA in H<sub>2</sub>O (1 mL) for 30 min at room temperature. Et<sub>2</sub>O/Pe (1:5, v/v) was added to the solution until the product precipitated: yield 0.07 g (90%); *R<sub>f</sub>(A)* 0.66; HPLC *K'* 7.26; mp 153-155 °C;  $[\alpha]_D^{20}$  -15.1; MH<sup>+</sup> 1047; <sup>1</sup>H-NMR (DMSO-*d*<sub>6</sub>) δ 1.29-1.55 (m, 6H), 1.92-2.34 (m, 4H), 2.92-3.29 (m, 8H), 3.41-3.51 (m, 4H), 3.95-4.92 (m, 4H), 6.11-7.28 (m, 23H).

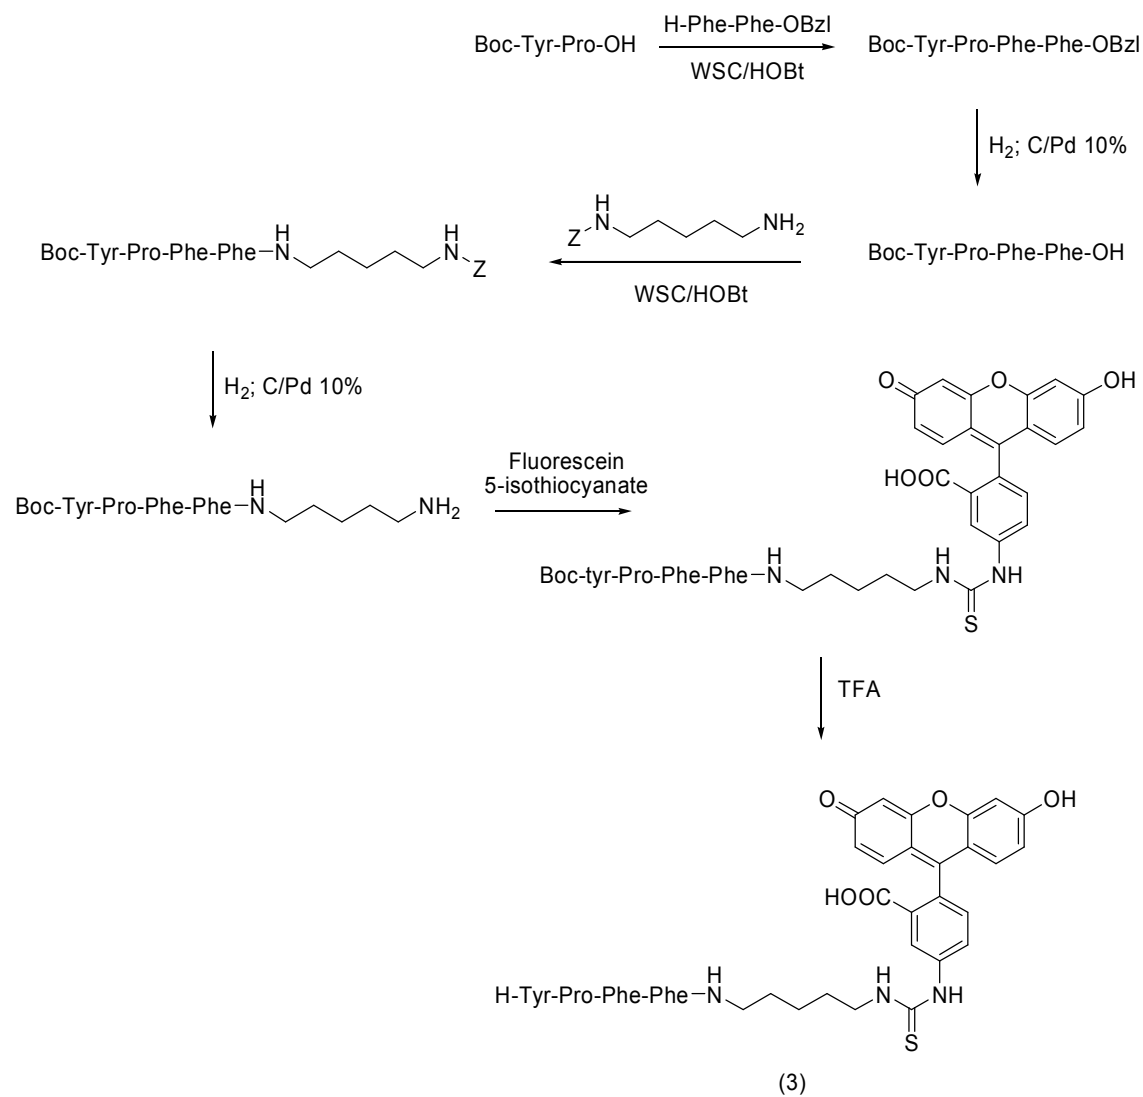

**Scheme 1. Synthesis of compound (3).**

**Table 3.** Elemental analysis of compounds **1-5**.<sup>a</sup>

| Comp. | Formula                                                                         | MH <sup>+</sup> , <i>m/z</i> |       | C     | H    | N     |
|-------|---------------------------------------------------------------------------------|------------------------------|-------|-------|------|-------|
| 1     | C <sub>53</sub> H <sub>60</sub> F <sub>6</sub> N <sub>8</sub> O <sub>14</sub>   | 920                          | Calc  | 55.49 | 5.27 | 9.77  |
|       |                                                                                 |                              | Found | 55.33 | 5.20 | 9.60  |
| 2     | C <sub>47</sub> H <sub>49</sub> F <sub>6</sub> N <sub>7</sub> O <sub>13</sub>   | 807                          | Calc  | 54.60 | 4.78 | 9.48  |
|       |                                                                                 |                              | Found | 54.89 | 4.94 | 9.27  |
| 3     | C <sub>60</sub> H <sub>60</sub> F <sub>3</sub> N <sub>7</sub> O <sub>12</sub> S | 1047                         | Calc  | 62.11 | 5.21 | 8.45  |
|       |                                                                                 |                              | Found | 61.98 | 5.06 | 8.31  |
| 4     | C <sub>59</sub> H <sub>65</sub> F <sub>6</sub> N <sub>9</sub> O <sub>13</sub>   | 995                          | Calc  | 57.98 | 5.36 | 10.31 |
|       |                                                                                 |                              | Found | 58.24 | 5.50 | 10.43 |
| 5     | C <sub>44</sub> H <sub>45</sub> F <sub>6</sub> N <sub>7</sub> O <sub>11</sub>   | 735                          | Calc  | 54.94 | 4.72 | 10.19 |
|       |                                                                                 |                              | Found | 54.78 | 4.65 | 10.03 |

<sup>a</sup> Only the analysis of the new compounds, detailed in the **Experimental Section**, are included.

### References

- (27) Salvadori, S.; Marastoni, M.; Balboni, G.; Borea, P.; Tomatis, R. Opioid peptides: synthesis and biological properties of dermorphin related hexapeptides. *Eur. J. Med. Chem.* **1990**, *25*, 171-177.
- (28) Oya, M.; Takahashi, T. The steric hindrance of the stepwise reaction of N-carboxy alpha amino acid anhydride with the alpha amino acid ester *Bull. Chem. Soc. Japan* **1981**, *54*, 2705-2707.
